# Supplementary material for: Controversies and evidence gaps in the early management of severe traumatic brain injury: back to the ABCs
Source: HighWire-hosted journal article supplement (doi:10.1136/tsaco-2021-000859), 2022-01-01
Supplement: tsaco-2021-000859supp001_data_supplement.pdf [file tsaco-2021-000859supp001_data_supplement.pdf]

Table 3. Antithrombotic reversal strategies

| Category of Antithrombotic         | Name        | Method/Agent of reversal                                                                                   |                                                                                                                                                                       |                                                                                                                                                                                                                                                                                                                                                   |                                                                                                                    |                                                                                                               |
|------------------------------------|-------------|------------------------------------------------------------------------------------------------------------|-----------------------------------------------------------------------------------------------------------------------------------------------------------------------|---------------------------------------------------------------------------------------------------------------------------------------------------------------------------------------------------------------------------------------------------------------------------------------------------------------------------------------------------|--------------------------------------------------------------------------------------------------------------------|---------------------------------------------------------------------------------------------------------------|
|                                    |             | 1 <sup>st</sup> step                                                                                       | 2 <sup>nd</sup> step                                                                                                                                                  | 3 <sup>rd</sup> step                                                                                                                                                                                                                                                                                                                              | 4 <sup>th</sup> step                                                                                               | 5 <sup>th</sup> step                                                                                          |
| <u>Vitamin K antagonists</u>       | Warfarin    | <u>Vitamin K</u><br>10 mg IV, should be used with other agents as it can take up to a day to normalize INR | <u>PCC</u><br>25 IU / Kg IV for INR 1.5-3.9<br>35 IU/Kg IV for INR 4-6<br>50 IU/Kg IV for INR >6<br>Although more expensive than FFP, it proved to be better than FFP | <u>FFP</u><br>5-30 mL/Kg                                                                                                                                                                                                                                                                                                                          | <u>Recheck PT/INR</u> at 1,6 & 24 h<br>If INR >1.5 at 1 h, 2-4 units FFP<br>If INR >1.5 at 6 h, Vitamin K 10 mg IV |                                                                                                               |
| <u>Direct factor Xa inhibitors</u> | Rivaroxaban | If ingested within 2 h, give one dose activated charcoal orally                                            | <u>Andexanet Alfa</u><br>400mg IV bolus;<br>480mg IV infusion if last dose >7h<br>800mg IV bolus;<br>960mg IV infusion if last dose <7h                               | <u>PCC</u><br><ul style="list-style-type: none"> <li>If Andexanet alpha is not available</li> <li>Preferably 4F-PCC (Kcentra) with a dose of 50 units/Kg</li> <li>Specific anti-Xa assays are the preferred tests to evaluate the anticoagulant effects of FXa-Is</li> </ul> Secondary end point analysis should show normalization of PT and INR | Rivaroxaban and Apixaban are not removed by dialysis                                                               | <u>Aripazine (PER977)</u><br>It was designed to bind to Heparin & LMWH & FXa-Is & direct thrombin inhibitors. |
|                                    | Apixaban    |                                                                                                            |                                                                                                                                                                       |                                                                                                                                                                                                                                                                                                                                                   |                                                                                                                    |                                                                                                               |
|                                    | Edoxaban    |                                                                                                            |                                                                                                                                                                       |                                                                                                                                                                                                                                                                                                                                                   |                                                                                                                    |                                                                                                               |
| <u>Direct thrombin inhibitors</u>  | Dabigatran  | If ingested within 2 h, give one dose activated charcoal orally                                            | <u>Idarucizumab</u><br>A dose of 5 g divided into 2 doses 2.5 g given IV ≤ 15 minutes apart<br>Approved for the reversal of dabigatran                                | <u>aPCC</u><br>(50 units/kg)<br>or<br><u>4-factor PCC</u><br>(50 units/kg)<br><br>if idarucizumab is not available                                                                                                                                                                                                                                | Consider emergent dialysis in patient with renal failure                                                           |                                                                                                               |

|                               |              |                                                                                          |                                                                                                                                                                                                                                                                                                                                                            |                                                                                                                                                                                                                                       |                                                                                                                 |
|-------------------------------|--------------|------------------------------------------------------------------------------------------|------------------------------------------------------------------------------------------------------------------------------------------------------------------------------------------------------------------------------------------------------------------------------------------------------------------------------------------------------------|---------------------------------------------------------------------------------------------------------------------------------------------------------------------------------------------------------------------------------------|-----------------------------------------------------------------------------------------------------------------|
| <u>Unfractionated Heparin</u> | Heparin      | Discontinue heparin infusion if intracranial hemorrhage is suspected or present.         | Reverse anticoagulation medications.                                                                                                                                                                                                                                                                                                                       | <u>Protamine sulfate</u><br>1mg for every 100 units of heparin given in the previous 2-3 hours with a maximum single dose of 50mg<br>If the aPTT remains elevated, repeat the protamine sulfate with a dose of 0.5mg/100 units of UFH |                                                                                                                 |
| <u>LMWHs and Heparinoids</u>  | Enoxaprin    | Discontinue LMWH infusion if intracranial hemorrhage is suspected or present.            | <u>Protamine sulfate</u><br>If enoxaparin was given within 8 h, administer protamine sulfate at a dose of 1mg/1 mg of enoxaparin administered (up to a maximum single dose of 50 mg).<br>If enoxaparin was given within 8–12 h, administer it at a dose of 0.5/1 mg of enoxaparin.<br>After 3–5 half-lives have elapsed, protamine is probably not needed. |                                                                                                                                                                                                                                       |                                                                                                                 |
|                               | Dalteprain   | Discontinue LMWH infusion if intracranial hemorrhage is suspected or present.            | <u>Protamine sulfate</u><br>1 mg/100 anti-Xa units of LMWH administered in the past 3–5 half-lives of the drug, up to a maximum single dose of 50 mg.                                                                                                                                                                                                      | <u>rFVIIa</u><br>(90 mcg/kg IV)<br>if protamine is contraindicated                                                                                                                                                                    |                                                                                                                 |
|                               | Nadroparin   |                                                                                          |                                                                                                                                                                                                                                                                                                                                                            |                                                                                                                                                                                                                                       |                                                                                                                 |
|                               | Tinzaparin   |                                                                                          |                                                                                                                                                                                                                                                                                                                                                            |                                                                                                                                                                                                                                       |                                                                                                                 |
|                               | Danaproid    | Discontinue LMWH infusion if intracranial hemorrhage is suspected or present.            | <u>rFVIIa</u><br>90mcg/Kg IV once.                                                                                                                                                                                                                                                                                                                         |                                                                                                                                                                                                                                       |                                                                                                                 |
| <u>Pentasaccharides</u>       | Fondaparinux | Discontinue pentasaccharide infusion if intracranial hemorrhage is suspected or present. | <u>aPCC</u><br>(20 IU/kg)                                                                                                                                                                                                                                                                                                                                  | <u>rFVIIa</u><br>(90 mcg/kg), if aPCC is contraindicated or not available                                                                                                                                                             |                                                                                                                 |
| <u>Antiplatelets</u>          | Aspirin      | Discontinue antiplatelets if intracranial                                                | Test platelet functions before doing unnecessary                                                                                                                                                                                                                                                                                                           | If testing is not available, empiric platelet transfusion                                                                                                                                                                             | A single dose of desmopressin DDAVP 0.4 mcg/kg IV in hemorrhage associated with aspirin/COX-1 inhibitors or ADP |
|                               | Ibuprofen    |                                                                                          |                                                                                                                                                                                                                                                                                                                                                            |                                                                                                                                                                                                                                       |                                                                                                                 |
|                               | Naproxen     |                                                                                          |                                                                                                                                                                                                                                                                                                                                                            |                                                                                                                                                                                                                                       |                                                                                                                 |

|  |              |                                     |                      |                                                                   |                      |
|--|--------------|-------------------------------------|----------------------|-------------------------------------------------------------------|----------------------|
|  | Dipyridamole | hemorrhage is suspected or present. | platelet transfusion | might be considered, if urgent neurosurgical intervention is due. | receptor inhibitors. |
|  | Clopidogrel  |                                     |                      |                                                                   |                      |
|  | Prasugrel    |                                     |                      |                                                                   |                      |
|  | Ticagrelor   |                                     |                      |                                                                   |                      |
|  | Ticlopidine  |                                     |                      |                                                                   |                      |
|  | Cilostazol   |                                     |                      |                                                                   |                      |
|  | Anagrelide   |                                     |                      |                                                                   |                      |
|  | Abiciximab   |                                     |                      |                                                                   |                      |
|  | Eptifibatide |                                     |                      |                                                                   |                      |
|  | Tirofiban    |                                     |                      |                                                                   |                      |
|  | Vorpaxar     |                                     |                      |                                                                   |                      |

4F PCC - 4 factor prothrombin complex concentrates, ADP - Adenosine diphosphate, aPCC - activated prothrombin complex concentrates, DDAVP - desmopressin, FFP - Fresh frozen plasma, INR - International normalized ratio, IU - International Unit, LWMH - low molecular weight heparin, PCC - prothrombin complex concentrates, rFVIIa - Recombinant factor VIIa, UFH - Unfractionated heparin
