# Supplementary material for: Controversies and evidence gaps in the early management of severe traumatic brain injury: back to the ABCs
Source: HighWire-hosted journal article supplement (doi:10.1136/tsaco-2021-000859), 2022-01-01
Supplement: tsaco-2021-000859supp002_data_supplement.pdf [file tsaco-2021-000859supp002_data_supplement.pdf]

**Highlights**

- Prompt resuscitation and stabilization remains the cornerstone of improving outcomes of traumatic brain injury (TBI).
- Evidence-based emergency medical services protocols for management and transportation are yet to be formally standardized.
- Despite the continuous efforts in setting standards for the early management of TBI, some controversies still remain.
- Due to the inherent susceptibility of TBI patients, physicians should be wary of progressive hemorrhagic injury.
- The role of tranexamic acid is still unclear in isolated TBI, and future studies should identify target populations.
